# Supplementary figures and images for: A fluorogenic probe for TRPA1 channel imaging based on a molecular rotation mechanism
Source: Royal Society of Chemistry journal article supplement (doi:10.1039/d2nj01728h), 2022-01-01

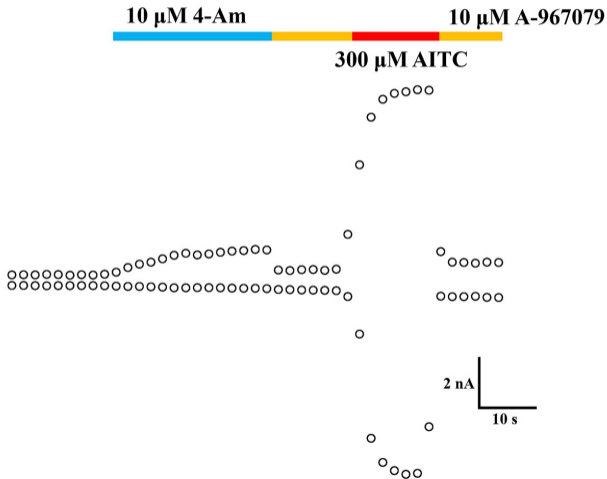

Supplement: d2nj01728h1.pdf [file d2nj01728h1.pdf]

**A**

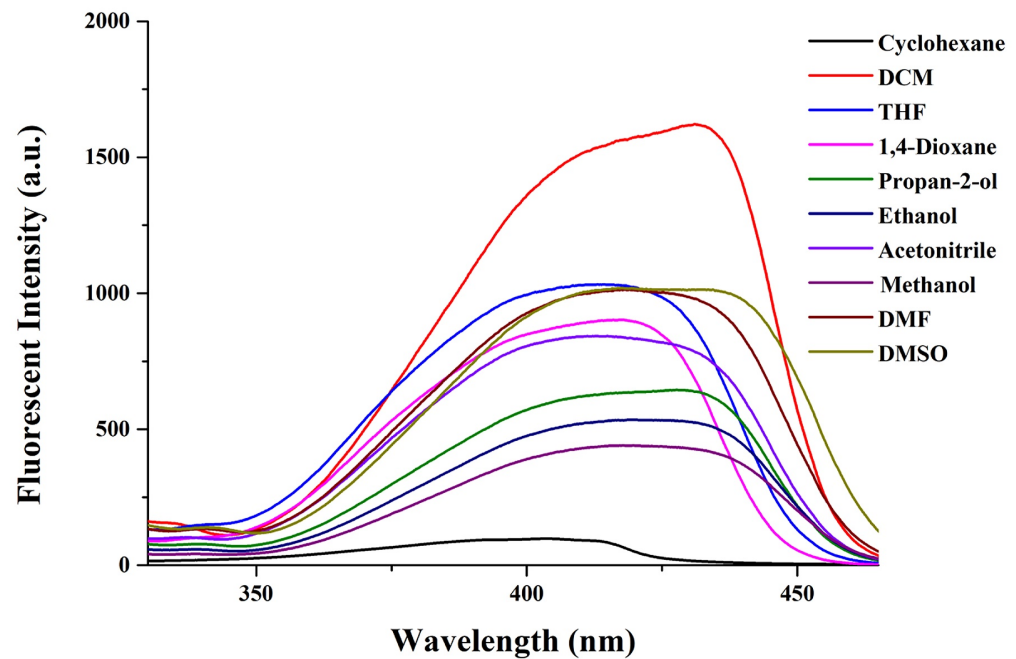

**B**

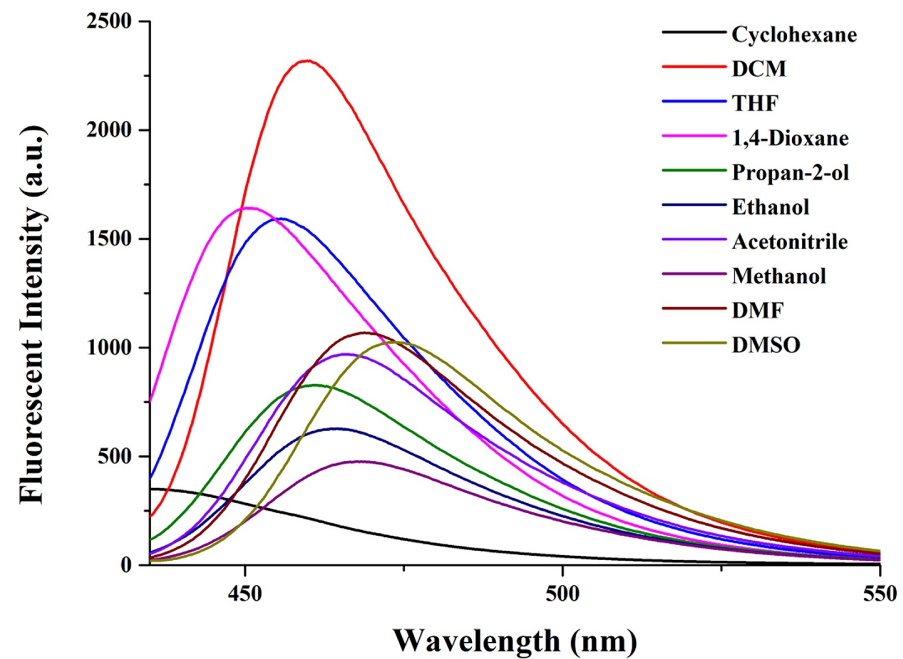

Supplement: d2nj01728h3.pdf [file d2nj01728h3.pdf]

**A**

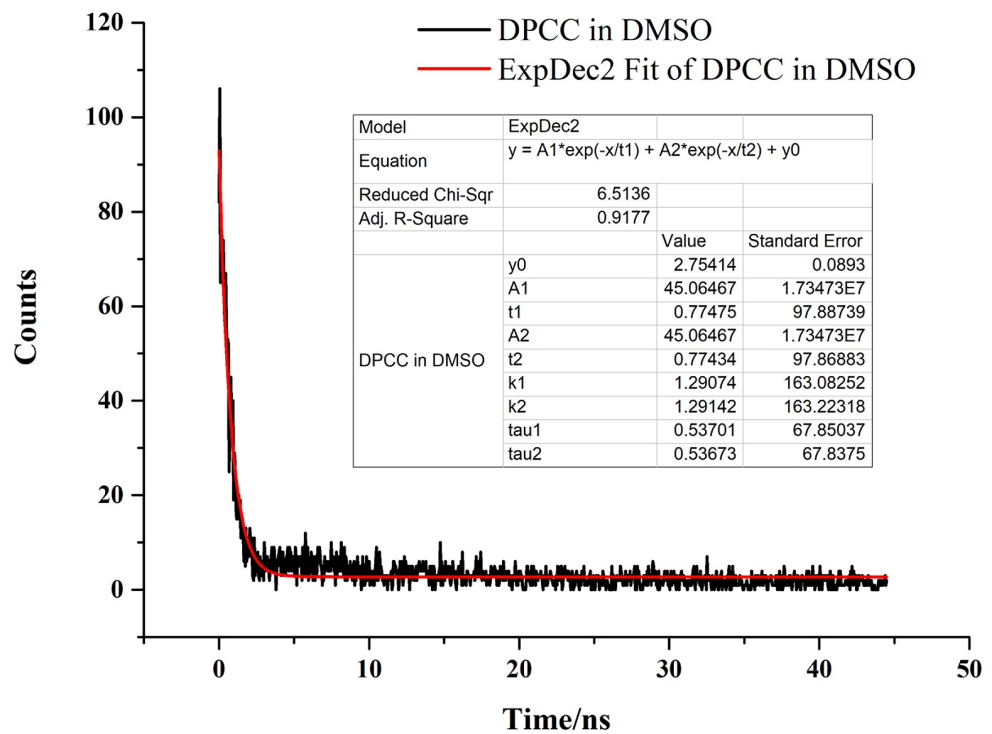

**B**

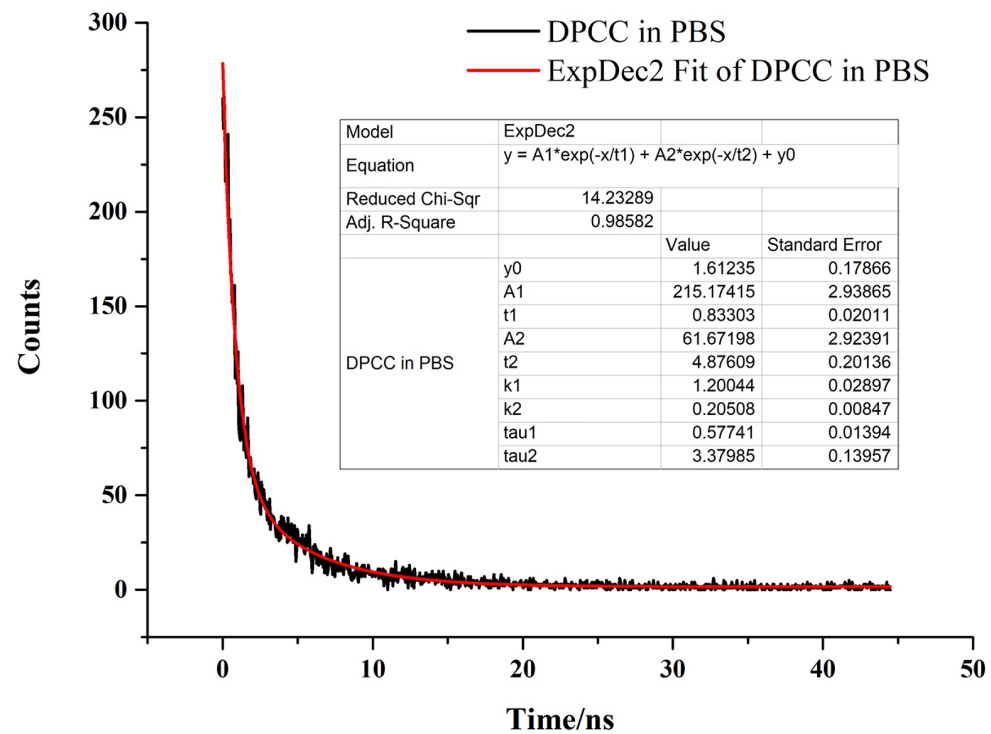

Supplement: d2nj01728h4.pdf [file d2nj01728h4.pdf]

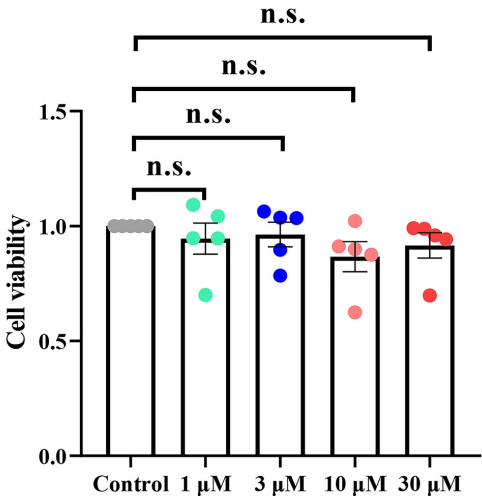

Supplement: d2nj01728h5.pdf [file d2nj01728h5.pdf]

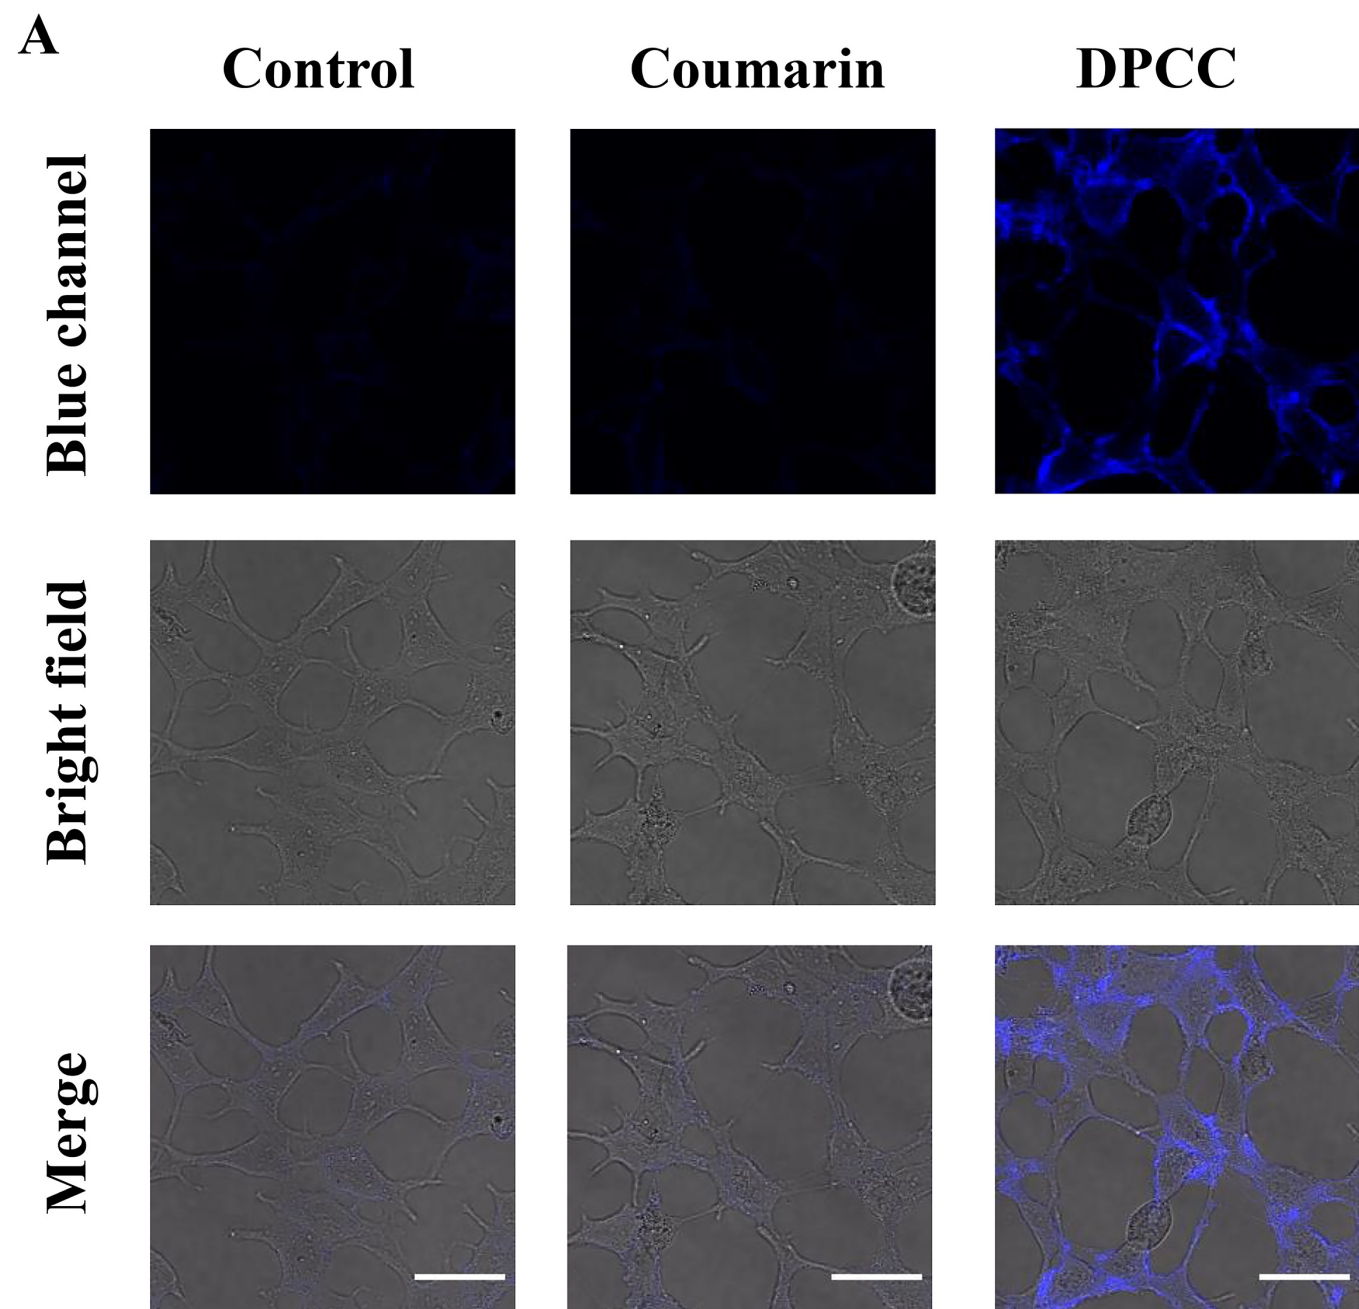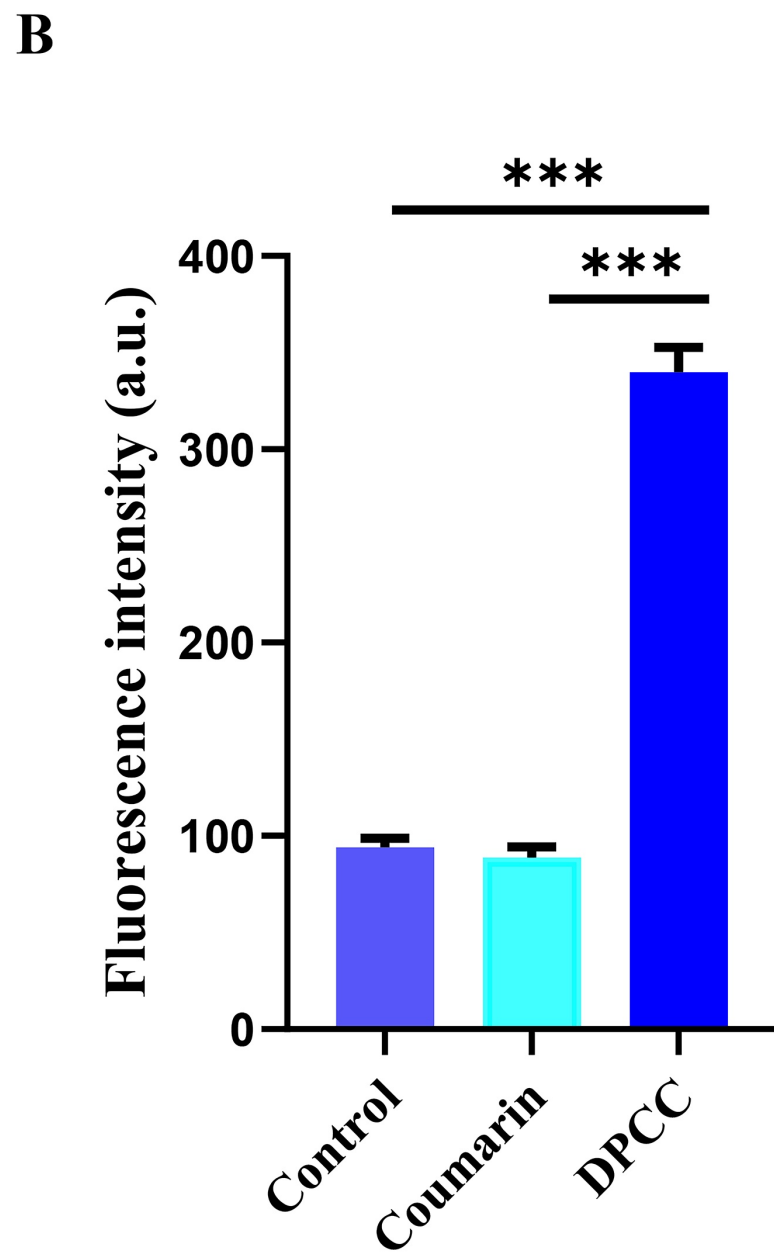

Supplement: d2nj01728h6.pdf [file d2nj01728h6.pdf]

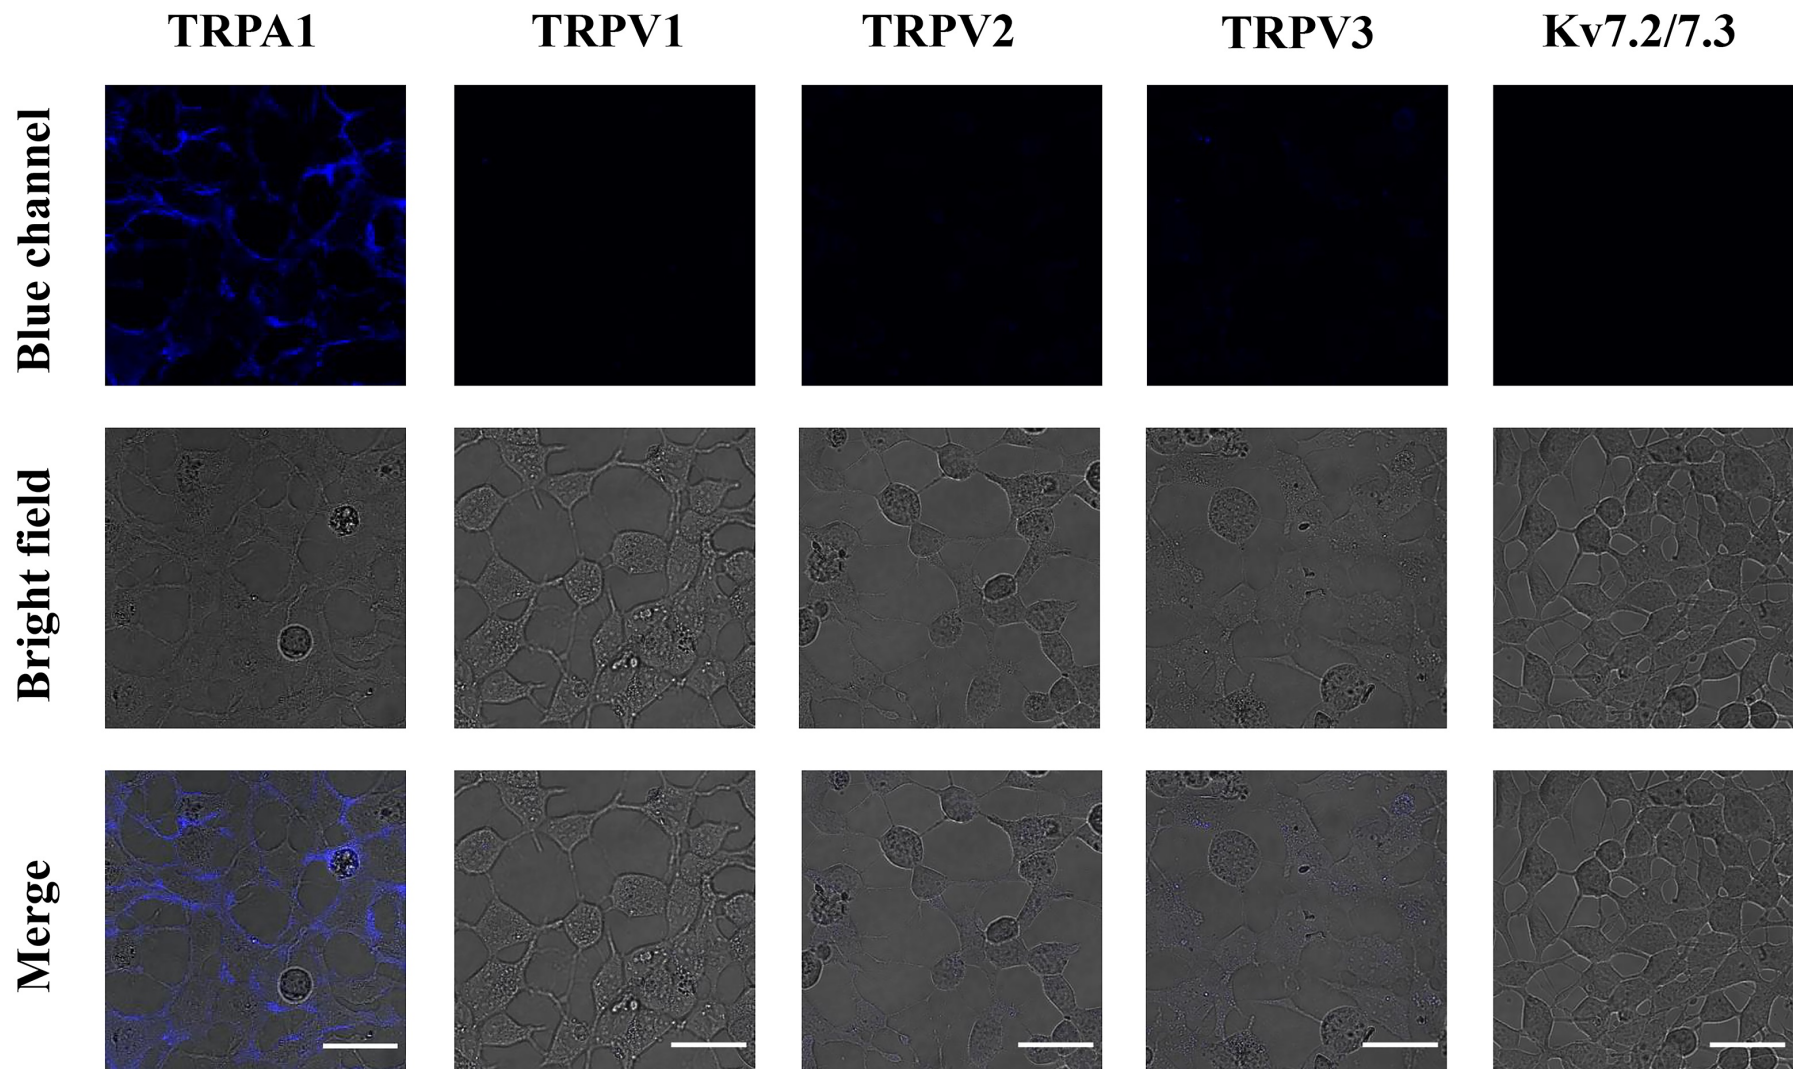

Supplement: d2nj01728h7.pdf [file d2nj01728h7.pdf]
